# Supplementary material for: The effect of LRRK2 loss-of-function variants in humans
Source: PubMed Central journal article supplement (PMC7303015; doi:10.1038/s41591-020-0893-5), 2020-05-27

---

**Supplementary information**

---

**The effect of LRRK2 loss-of-function variants in humans**

---

In the format provided by the authors and unedited

**Supplementary Figure 1:** Comparison of 30 blood serum and 4 urine biomarkers between *LRRK2* pLoF carriers (teal), G2019S risk allele carriers (blue) and carriers of neither (None; grey). The mean and standard deviation in each cohort are shown by black circles and lines respectively. For some biomarkers plots have been top truncated to remove outliers in the non-carrier cohort. Values for all pLoF and G2019S carriers are shown within each plot area. In each case, summary statistics are calculated on the full dataset.

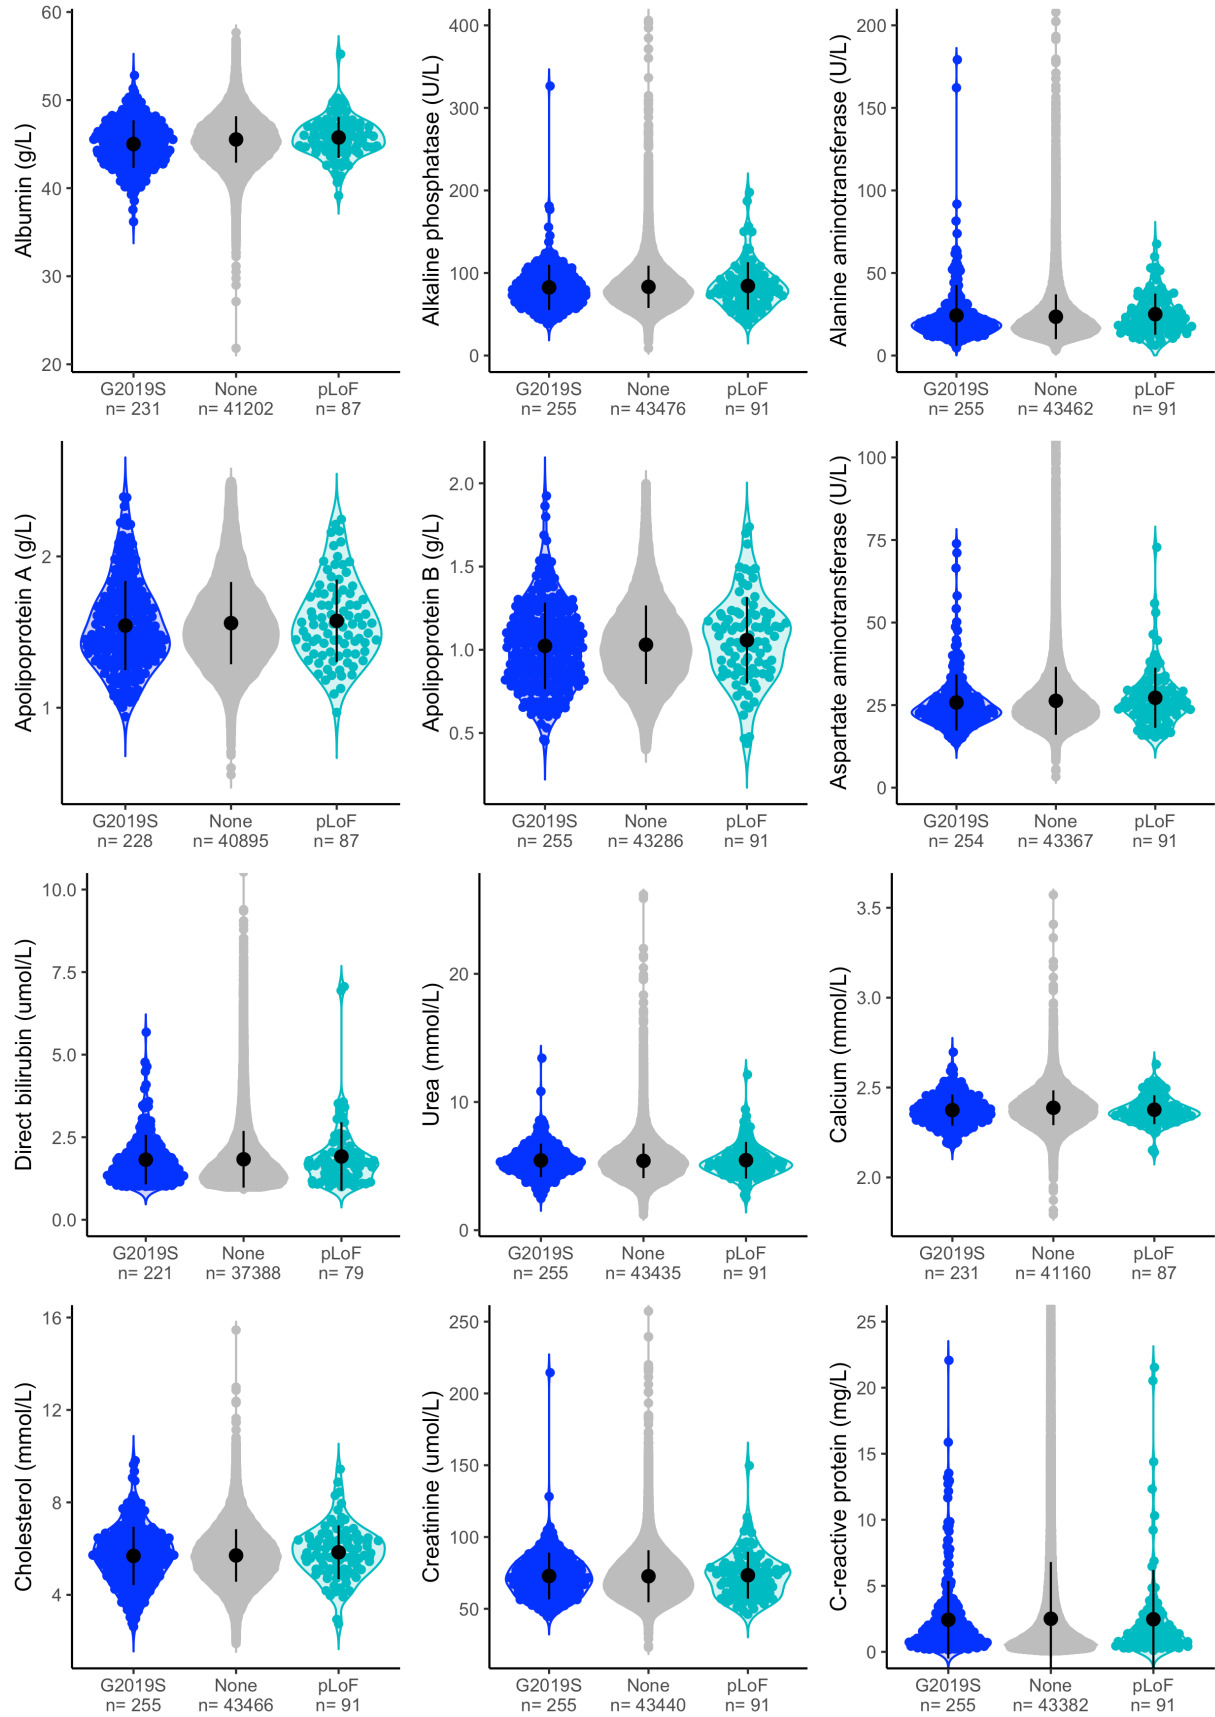

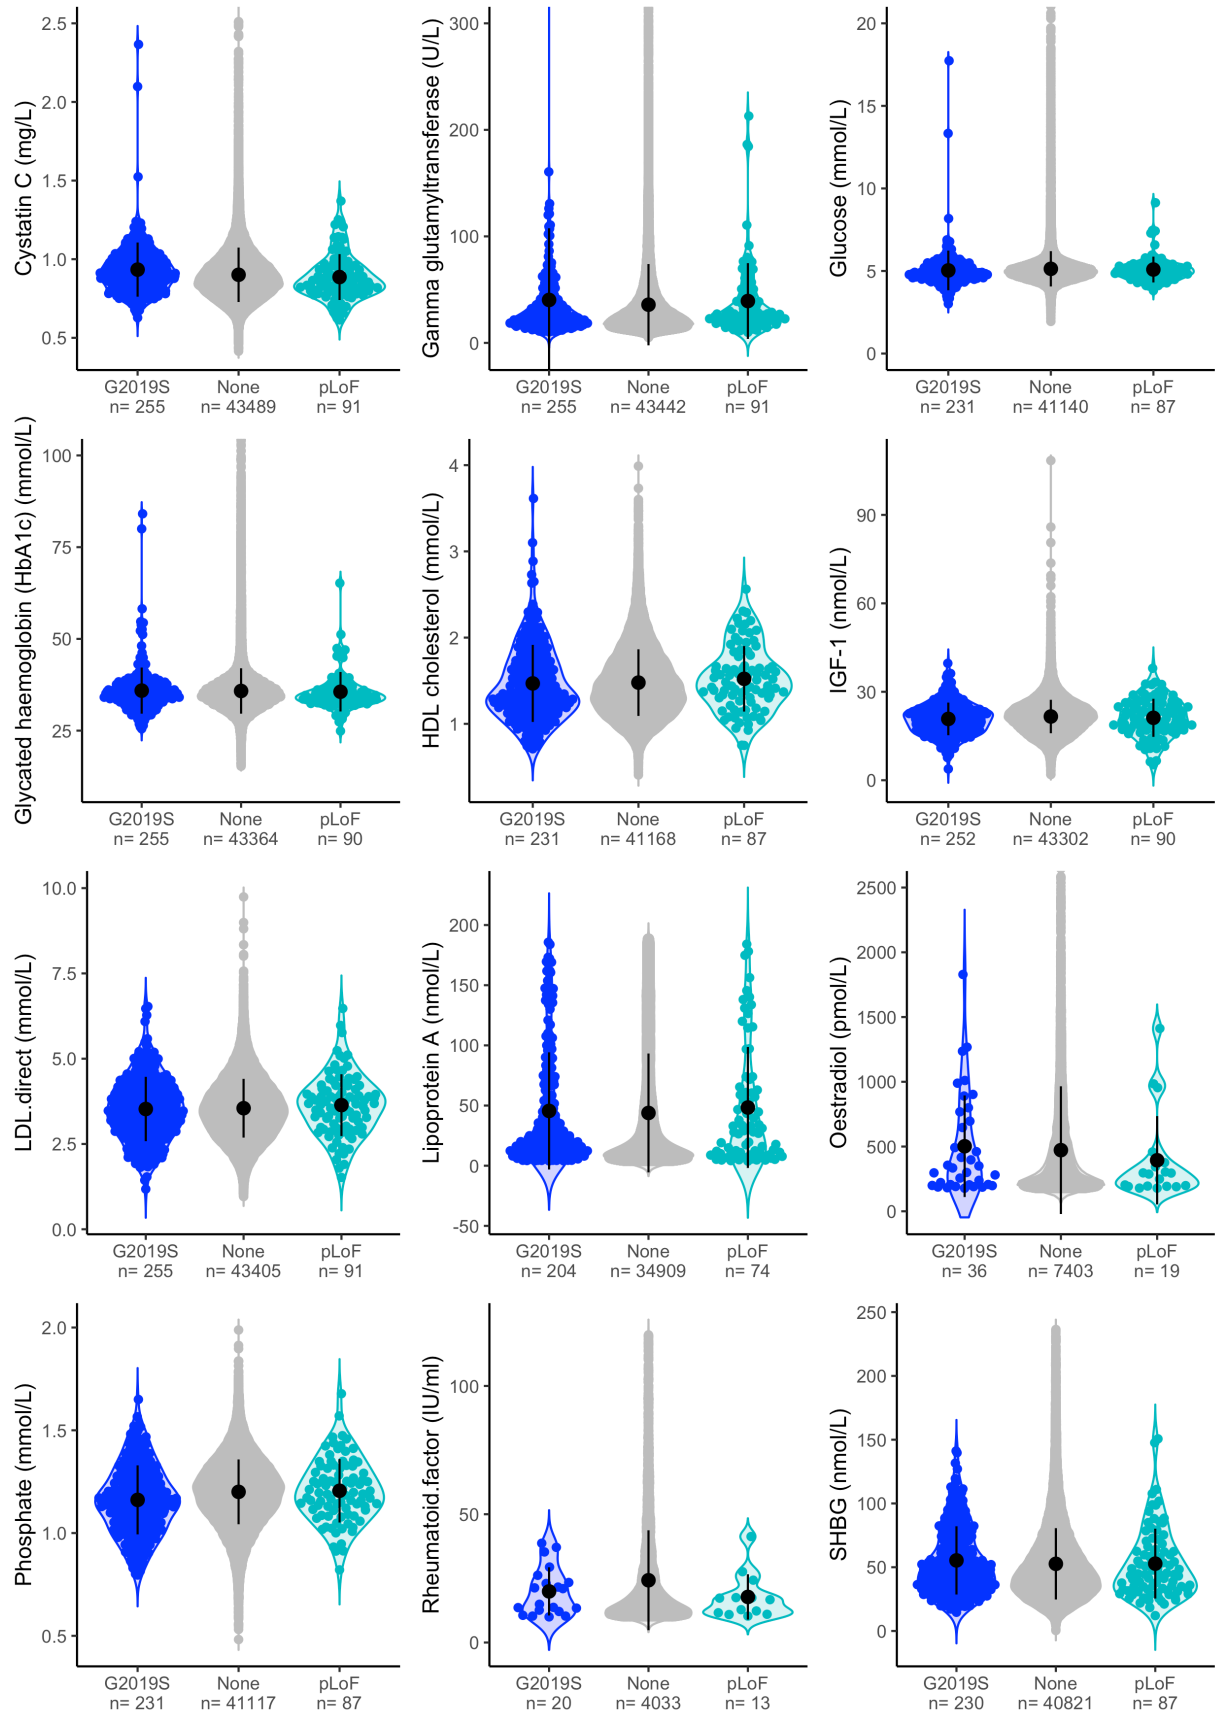

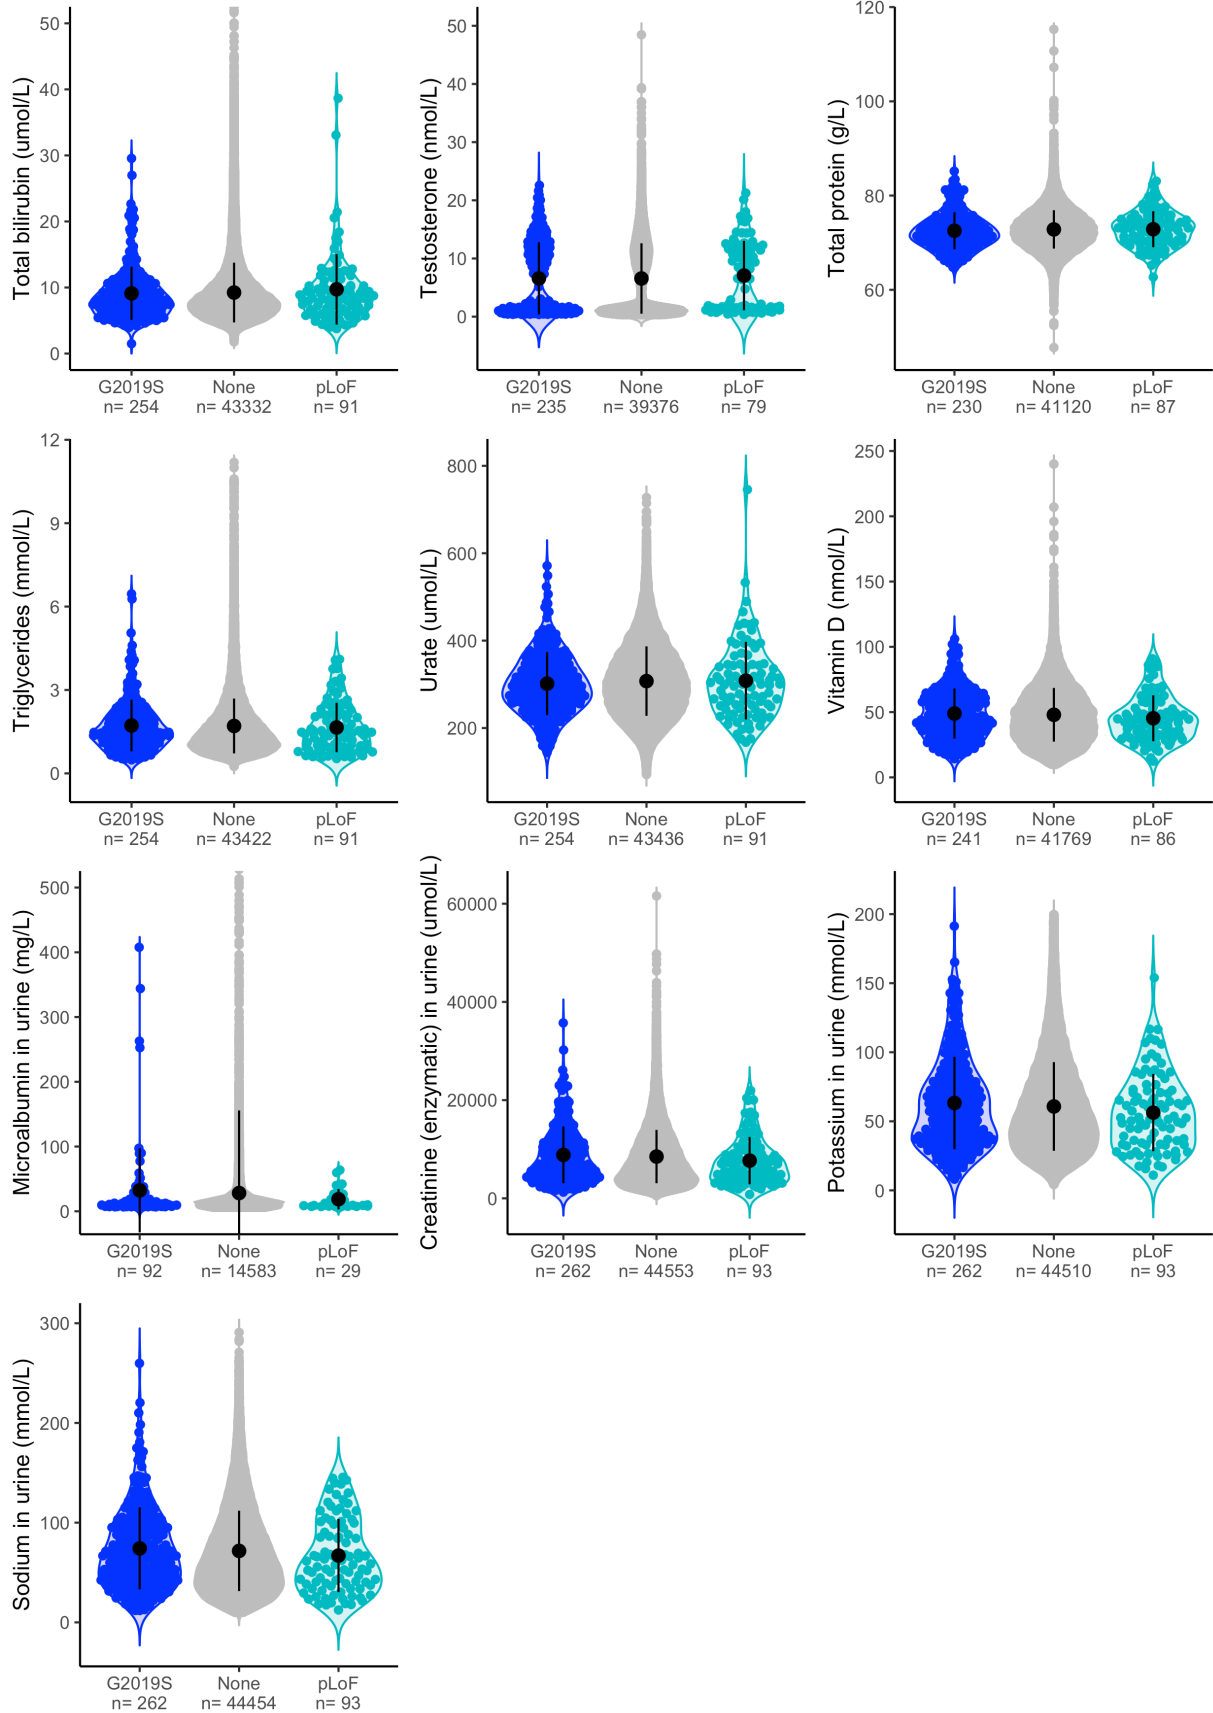

Supplement: 41591_2020_893_MOESM1_ESM.pdf [file 41591_2020_893_MOESM1_ESM.pdf]
