# Supplementary material for: The effect of LRRK2 loss-of-function variants in humans
Source: PubMed Central journal article supplement (PMC7303015; doi:10.1038/s41591-020-0893-5), 2020-05-27

Unprocessed Immunoblots for Figure 2

(a) LRRK2

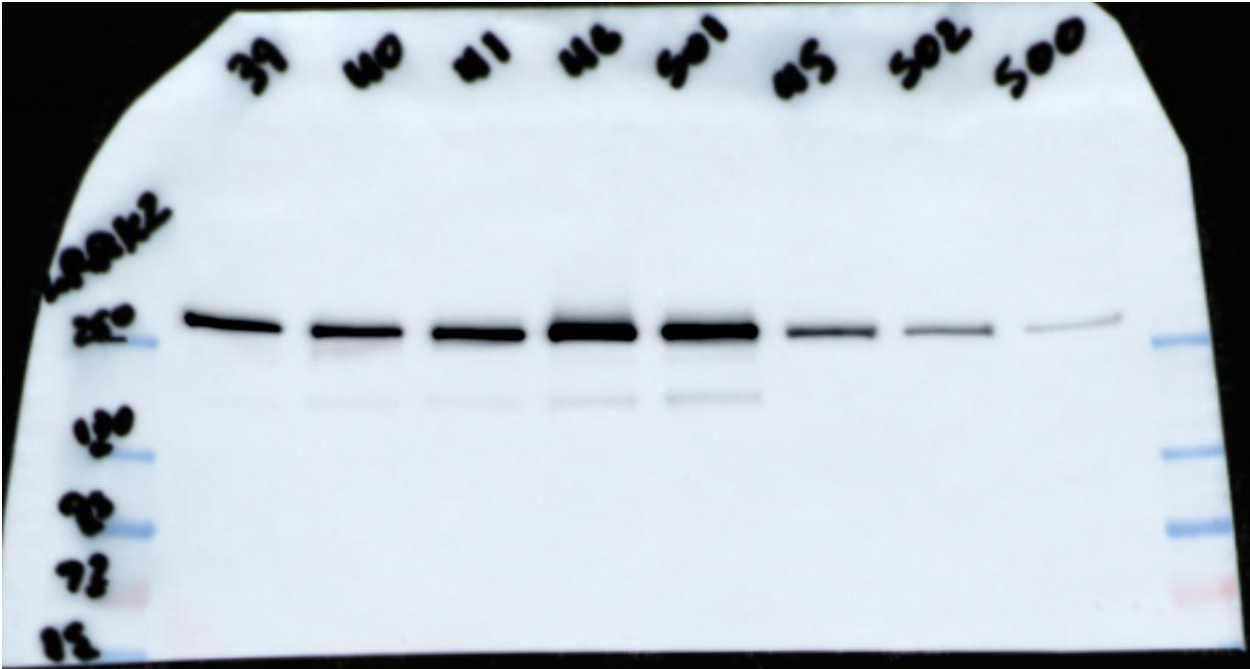

GAPDH

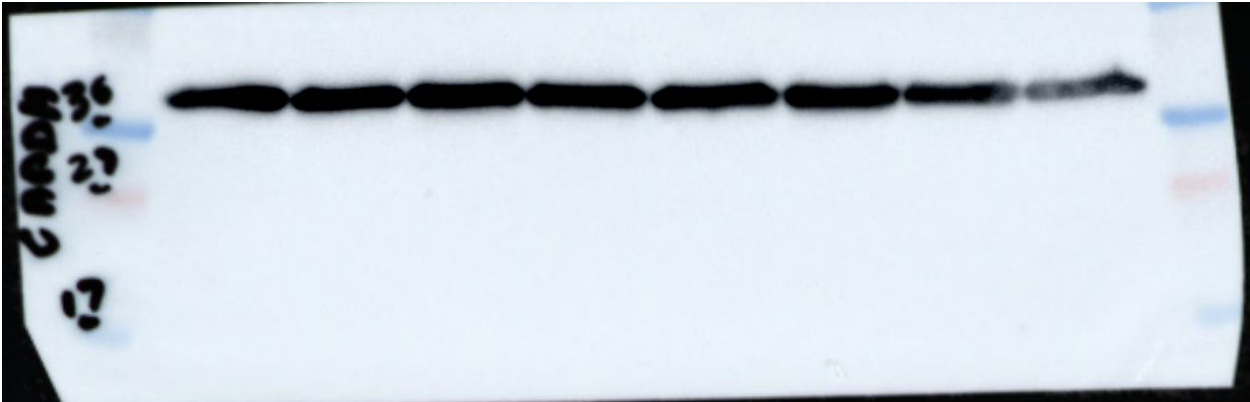

(b) LRRK2

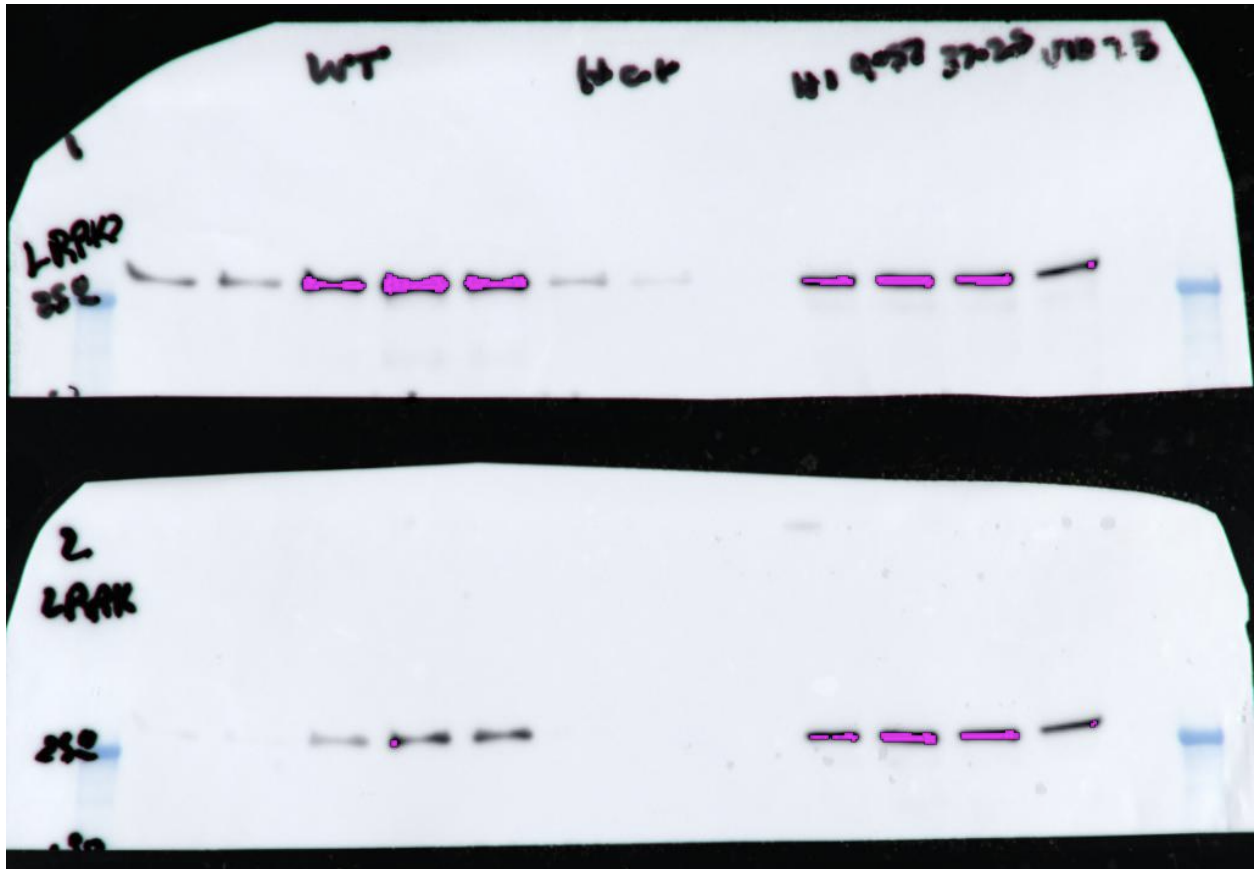

Alpha-actinin

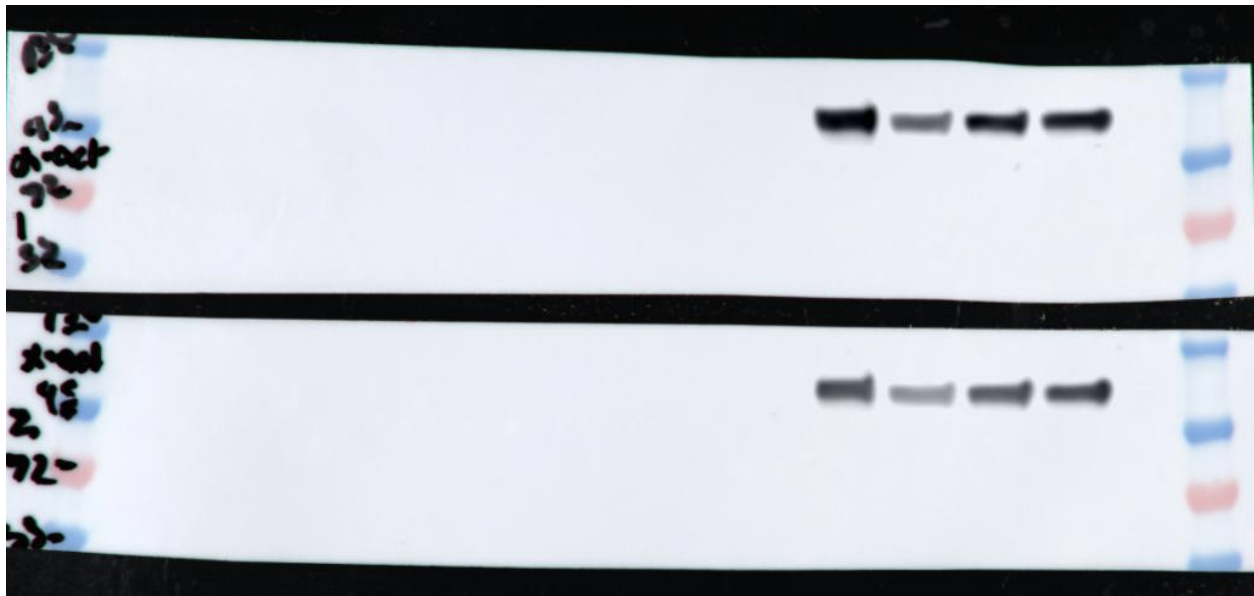

GAPDH

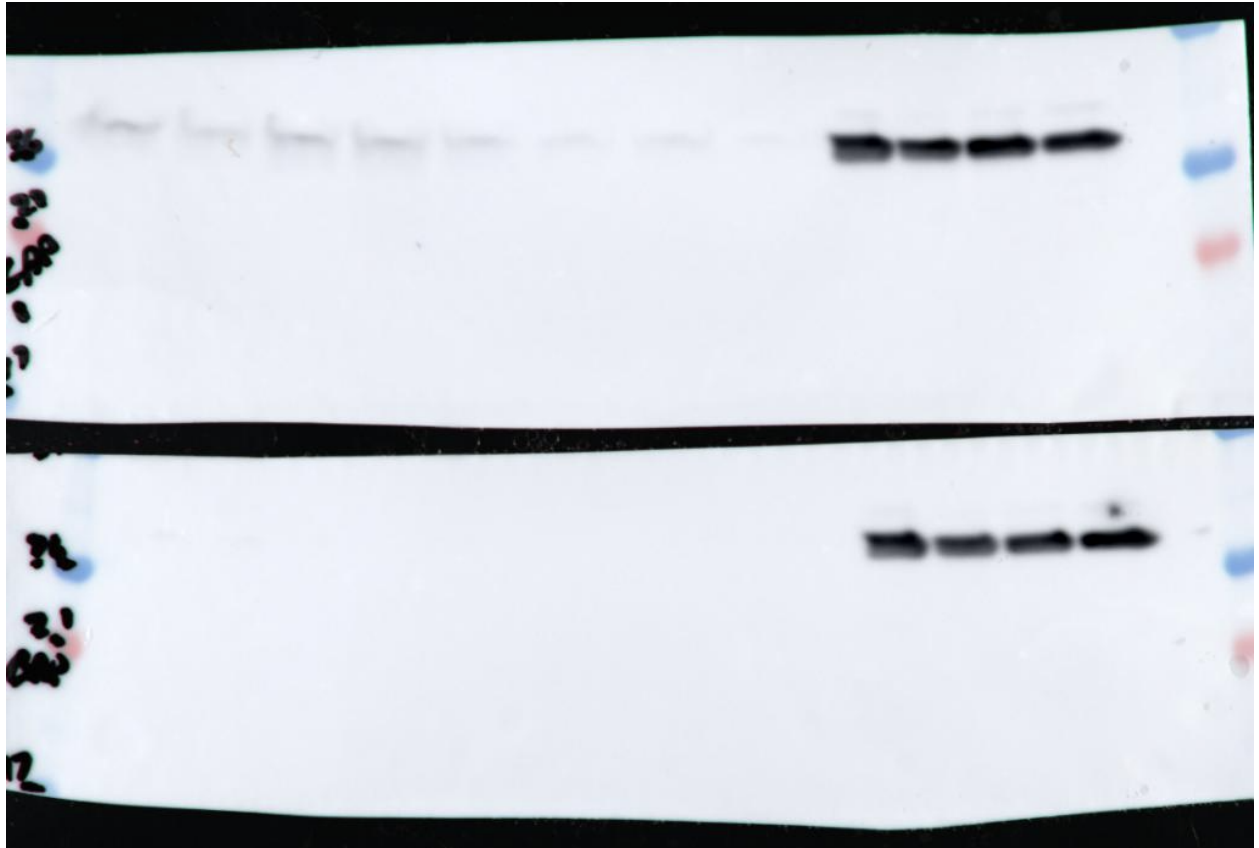

Supplement: 41591_2020_893_MOESM4_ESM.pdf [file 41591_2020_893_MOESM4_ESM.pdf]
